# Supplementary material for: The antidepressant-like effects of pioglitazone in a chronic mild stress mouse model are associated with PPARγ-mediated alteration of microglial activation phenotypes
Source: PubMed Central journal article supplement (PMC5051050; doi:10.1186/s12974-016-0728-y), 2016-10-04
Supplement: 12974_2016_728_MOESM1_ESM.pdf [file 12974_2016_728_MOESM1_ESM.pdf]

BW and SP ratio in different weeks of experiment 1.

| Group        | Week 0     |          | Week 1     |          | Week 2     |          | Week 3     |          | Week 4     |           | Week 5     |          | Week 6     |           |
|--------------|------------|----------|------------|----------|------------|----------|------------|----------|------------|-----------|------------|----------|------------|-----------|
|              | BW (g)     | SP (%)   | BW (g)     | SP (%)   | BW (g)     | SP (%)   | BW (g)     | SP (%)   | BW (g)     | SP (%)    | BW (g)     | SP (%)   | BW (g)     | SP (%)    |
| Control      | 20.59±0.88 | 84.3±2.9 | 21.63±1.38 | 68.3±8.5 | 22.06±1.21 | 72.9±2.6 | 22.60±1.36 | 77.9±4.8 | 23.15±0.73 | 84.1±9.2  | 23.36±1.01 | 86.1±4.7 | 25.22±0.84 | 88.8±6.2  |
| CMS+Vehicle  | 20.60±0.98 | 84.8±3.5 | 20.35±1.43 | 69.6±7.5 | 20.38±0.76 | 73.0±5.2 | 20.55±0.80 | 75.7±5.4 | 21.03±1.09 | 76.4±2.3  | 21.25±1.23 | 79.5±6.3 | 21.48±0.90 | 79.5±5.8  |
| CMS+2.5mg/kg | 20.56±0.74 | 84.9±6.7 | 21.11±0.86 | 75.5±7.6 | 21.73±1.61 | 81.7±4.8 | 21.93±0.65 | 77.9±4.5 | 22.18±1.12 | 78.6±4.7  | 22.61±1.33 | 83.8±9.8 | 24.10±0.79 | 87.2±8.8  |
| CMS+5.0mg/kg | 20.59±0.84 | 82.7±7.2 | 21.10±0.94 | 68.5±5.8 | 21.63±1.44 | 79.4±6.4 | 21.66±1.41 | 78.3±7.4 | 21.99±0.73 | 84.1±10.2 | 22.33±1.39 | 82.7±8.4 | 23.62±0.57 | 87.2±6.3  |
| CMS+10mg/kg  | 20.63±1.21 | 82.7±6.1 | 21.05±0.88 | 67.5±4.7 | 21.48±0.72 | 80.1±7.4 | 21.29±1.21 | 79.2±9.5 | 21.74±0.85 | 84.8±9.5  | 21.87±1.30 | 80.1±7.5 | 23.40±0.88 | 81.8±8.5  |
| CMS+20mg/kg  | 20.63±0.91 | 81.1±8.5 | 20.70±1.01 | 68.7±6.8 | 21.28±0.96 | 81.5±5.3 | 20.55±1.03 | 73.4±6.1 | 21.54±1.00 | 80.4±8.6  | 21.94±1.41 | 73.9±9.7 | 23.26±0.58 | 77.3±10.4 |
| p values     | p>0.05     | p>0.05   | p>0.05     | p>0.05   | p>0.05     | p>0.05   | p>0.05     | p>0.05   | p>0.05     | p>0.05    | p>0.05     | p>0.05   | p<0.05     | p<0.05    |
