# Supplementary material for: The antidepressant-like effects of pioglitazone in a chronic mild stress mouse model are associated with PPARγ-mediated alteration of microglial activation phenotypes
Source: PubMed Central journal article supplement (PMC5051050; doi:10.1186/s12974-016-0728-y), 2016-10-04
Supplement: 12974_2016_728_MOESM2_ESM.pdf [file 12974_2016_728_MOESM2_ESM.pdf]

BW and SP ratio in different weeks of experiment 2.

|             | Week 0       |            | Week 1       |             | Week 2       |            | Week 3       |            | Week 4       |            | Week 5       |            | Week 6       |             |
|-------------|--------------|------------|--------------|-------------|--------------|------------|--------------|------------|--------------|------------|--------------|------------|--------------|-------------|
| Group       | BW (g)       | SP (%)     | BW (g)       | SP (%)      | BW (g)       | SP (%)     | BW (g)       | SP (%)     | BW (g)       | SP (%)     | BW (g)       | SP (%)     | BW (g)       | SP (%)      |
| Control     | 20.57 ± 1.12 | 80.2 ± 8.2 | 21.47 ± 1.08 | 68.3 ± 3.9  | 22.55 ± 0.70 | 72.9 ± 4.2 | 23.16 ± 0.61 | 77.9 ± 3.9 | 23.58 ± 0.95 | 84.1 ± 4.2 | 24.03 ± 0.82 | 86.1 ± 3.6 | 25.22 ± 0.78 | 80.7 ± 4.7  |
| CMS+Vehicle | 20.58 ± 1.05 | 80.0 ± 7.8 | 21.27 ± 0.95 | 69.6 ± 2.9  | 21.96 ± 0.45 | 73.0 ± 6.2 | 22.23 ± 0.68 | 75.7 ± 5.4 | 22.87 ± 0.92 | 76.4 ± 9.5 | 23.08 ± 0.91 | 79.5 ± 4.7 | 23.70 ± 0.34 | 62.5 ± 9.5  |
| CMS+Piog    | 20.52 ± 0.95 | 79.4 ± 9.5 | 21.21 ± 0.68 | 75.5 ± 4.5  | 21.76 ± 0.24 | 81.7 ± 2.2 | 21.98 ± 0.53 | 77.9 ± 2.5 | 22.67 ± 0.74 | 78.6 ± 4.5 | 23.52 ± 0.48 | 83.8 ± 4.4 | 25.08 ± 0.71 | 79.0 ± 10.2 |
| CMS+GW      | 20.58 ± 0.79 | 81.2 ± 5.9 | 21.27 ± 0.80 | 68.5 ± 8.6  | 21.72 ± 0.62 | 79.4 ± 8.5 | 18.63 ± 0.49 | 78.3 ± 4.2 | 18.85 ± 1.21 | 84.1 ± 4.6 | 20.42 ± 0.73 | 82.7 ± 3.8 | 21.17 ± 0.56 | 70.5 ± 6.8  |
| CMS+Piog+GW | 20.62 ± 0.53 | 79.4 ± 3.8 | 21.12 ± 0.72 | 67.5 ± 11.2 | 21.41 ± 0.89 | 80.1 ± 8.1 | 19.66 ± 0.69 | 79.2 ± 6.0 | 20.73 ± 0.43 | 84.8 ± 3.2 | 21.11 ± 0.66 | 80.1 ± 4.7 | 21.93 ± 0.60 | 72.1 ± 12.1 |
| p values    | p>0.05       | p>0.05     | p>0.05       | p>0.05      | p>0.05       | p>0.05     | p>0.05       | p>0.05     | p>0.05       | p>0.05     | p>0.05       | p>0.05     | p<0.05       | p<0.05      |
